# Supplementary material
Source: PubMed Central journal article supplement (PMC9194619)
Supplement: djab218_supplementary_data.pdf [file djab218_supplementary_data.pdf]

## SUPPLEMENTARY MATERIAL

Supplementary Table 1. List of trials included in the ARCAD Database, dates, main publication, patient numbers.<sup>a</sup>

| Study                | Group/company | Principle investigator or first author | Publication year | PMID                 | No. randomized |
|----------------------|---------------|----------------------------------------|------------------|----------------------|----------------|
| N9741                | NCCTG         | Goldberg                               | 2002             | 12453321             | 1416           |
| C97-3                | GERCOR        | Tournigand                             | 2003             | 14657227             | 226            |
| BOND                 | Merck         | Cunningham                             | 2004             | 15269313             | 329            |
| AVF2107g             | Roche/GNE     | Hurwitz                                | 2004             | 15175435             | 923            |
| CALGB 80405          | Alliance      | Venook                                 | 2005             | 16356309             | 2326           |
| AVF2192              | Roche/GNE     | Kabbinavar                             | 2005             | 15738537             | 209            |
| FOLFOXIRI vs FOLFIRI | HORG          | Souglakos                              | 2006             | 16508637             | 283            |
| OPTIMOX1             | GERCOR        | Tournigand                             | 2006             | 16421419             | 620            |
| E3200                | ECOG          | Giantonio                              | 2007             | 17442997             | 829            |
| CAIRO1               | DCCG          | Punt                                   | 2007             | 17630036             | 820            |
| BICC-C               | Pfizer        | Fuchs                                  | 2007             | 17947725             | 547            |
| Panitumumab vs. BSC  | Amgen         | Van Cutsem                             | 2007             | 17470858             | 463            |
| FOCUS1&2             | MRC UK        | Seymour                                | 2007             | 17630037             | 2577           |
| NCIC CO.17           | NCIC-CTG      | Jonker                                 | 2007             | 18003960             | 572            |
| XELOX vs FOLFOX      | TTD           | Diaz Rubio/Aranda                      | 2007             | 17548839             | 342            |
| FOLFOXIRI vs FOLFIRI | GONO          | Falcone                                | 2007             | 17470860             | 244            |
| CAPOX vs FUFOX       | AIO           | Porschen                               | 2007             | 17548840             | 474            |
| EPIC                 | BMS           | Sobrero                                | 2008             | 18390971             | 1298           |
| NO16967              | Roche/GNE     | Rothenberg                             | 2008             | 18550577             | 627            |
| NO16966              | Roche/GNE     | Saltz                                  | 2008             | 18421053             | 2034           |
| CAIRO2               | DCCG          | Punt                                   | 2009             | 19196673             | 755            |
| OPTIMOX2             | GERCOR        | Tournigand                             | 2009             | 19786657             | 203            |
| N9841                | NCCTG         | Pitot                                  | 2009             | 19380443             | 491            |
| PACCE                | Amgen         | Hecht                                  | 2009             | 19114685             | 1053           |
| OPUS                 | Merck         | Bokemeyer                              | 2009             | 19114683             | 344            |
| CRYSTAL              | Merck         | Van Cutsem                             | 2009             | 19339720             | 1221           |
| MAX                  | AGITG         | Tebbutt                                | 2010             | 20516443             | 471            |
| 181                  | Amgen         | Peeters/Van Cutsem                     | 2010             | 20921462             | 1186           |
| FOCUS2               | MRC UK        | Seymour                                | 2011             | 21570111             | 459            |
| COIN                 | MRC UK        | Maughan / Adams                        | 2011             | 21641636<br>21641867 | 2445           |
| MACRO                | TTD           | Diaz Rubio/Aranda                      | 2012             | 22234633             | 480            |
| HORIZON II           | Astra Zeneca  | Hoff, Schmoll                          | 2012             | 22965965             | 1076           |
| HORIZON III          | Astra Zeneca  | Schmoll                                | 2012             | 22965961             | 1601           |
| VELOUR               | Sanofi        | Van Cutsem                             | 2012             | 22949147             | 1226           |
| CORRECT              | Bayer         | Grothey                                | 2013             | 23177514             | 760            |

|            |               |            |      |          |       |
|------------|---------------|------------|------|----------|-------|
| TML        | Roche/GNE     | Arnold     | 2013 | 23168366 | 820   |
| COIN B     | MRC (UK)      | Wasan      | 2014 | 24703531 | 226   |
| PRIME      | Amgen         | Douillard  | 2014 | 24718886 | 1183  |
| TRIBE      | GONO          | Falcone    | 2014 | 25337750 | 508   |
| FIRE II    | AIO           | Heinemann  | 2011 | 21300933 | 177   |
| FIRE III   | AIO           | Heinemann  | 2014 | 25088940 | 592   |
| CAIRO3     | DCCG          | Koopman    | 2015 | 25862517 | 557   |
| RECOURSE   | Taiho/Servier | Mayer      | 2015 | 25970050 | 800   |
| BEBYP      | GONO          | Falcone    | 2015 | 25600568 | 184   |
| DREAM      | GERCOR        | Tournigand | 2015 | 26474518 | 700   |
| RAISE      | Lilly         | Tabernero  | 2015 | 26065608 | 1072  |
| AIO 0207   | AIO           | Arnold     | 2015 | 26361971 | 825   |
| SAKK 41/06 | SAKK          | Koeberle   | 2015 | 25605741 | 262   |
| Total      | —             | —          | —    | —        | 38368 |

<sup>a</sup>NCCTG = North Central Cancer Treatment Group; GERCOR = Groupe Coopérateur Multidisciplinaire en Oncologie; GNE = Genentech; HORG = Haematology-Oncology Research Group; ECOG = Eastern Cooperative Oncology Group; DCCG = Dutch Colorectal Cancer Group; MRC = Medical Research Council; NCIC-CTG = National Cancer Institute of Canada – Clinical Trials Group; TTD = Grupo de Tratamiento de los Tumores Digestivos; GONO = Gruppo Oncologico del Nord-Ovest; AIO = Arbeitsgemeinschaft Internistische Onkologie; BMS = Bristol Myers Squibb; AGITG = Australasian Gastro-Intestinal Trials Group; SAKK = Swiss Group for Clinical Cancer Research.
